# Supplementary material for: Total synthesis, structure revision and cytotoxic activity of Sch 53825 and its derivatives
Source: Royal Society of Chemistry journal article supplement (doi:10.1039/d2ra02898k), 2022-01-01
Supplement: d2ra02898k1.pdf [file d2ra02898k1.pdf]

**Electronic Supplementary Material (ESI) for RSC advances.**  
**This journal is ©The Royal Society of Chemistry 2022**

### **Supporting Information**

## **Total Synthesis, Structure Revision and Cytotoxic Activity of Sch 53825 and Its Derivatives**

**Leichuan Xu, Haoyun Ma, Xinkun An, Yihao Li, Qian Zhang, Xinlei Liu and Mingan Wang\***  
Department of Applied Chemistry, China Agricultural University, Beijing 100193, P. R. of China

E-mail: wangma@cau.edu.cn

### **Table of Contents**

|                                                                           |               |
|---------------------------------------------------------------------------|---------------|
| <b>1. Copies of NMR Spectra of Synthesized Compounds.....</b>             | <b>S2-S15</b> |
| <b>2. High Resolution Mass Spectro copies of Compounds 14 and 15.....</b> | <b>S16</b>    |
| <b>3. HPLC profiles of compound (±)- and (+)-13.....</b>                  | <b>S17</b>    |
| <b>4. The Crystal Structure Parameters for Compound 1.....</b>            | <b>S18-24</b> |

# 1. Copies of NMR Spectra of Synthesized Compounds

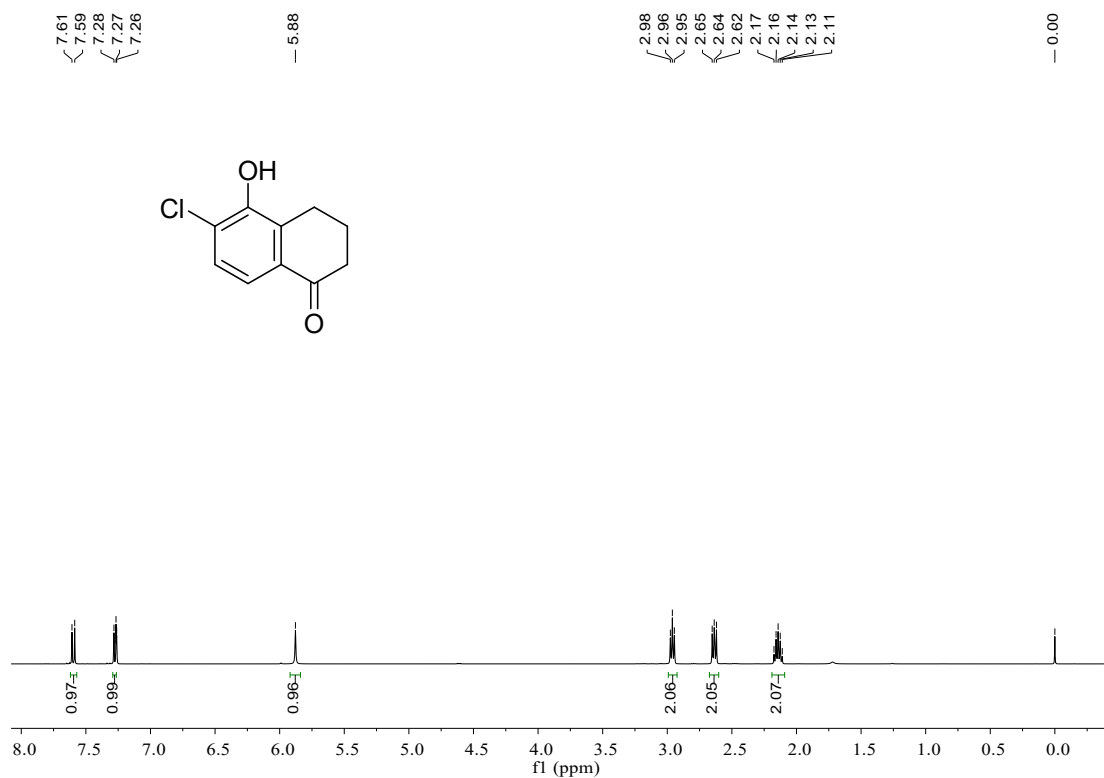

Figure S1 <sup>1</sup>H NMR of compound 6

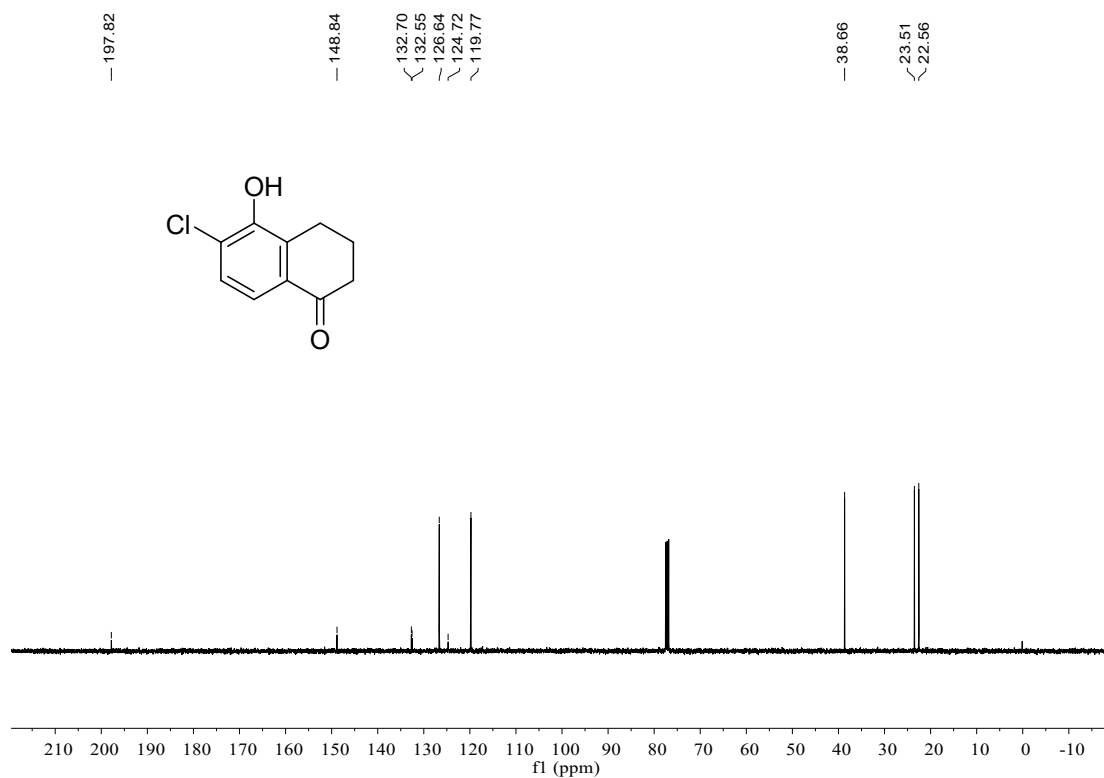

Figure S2 <sup>13</sup>C NMR of compound 6

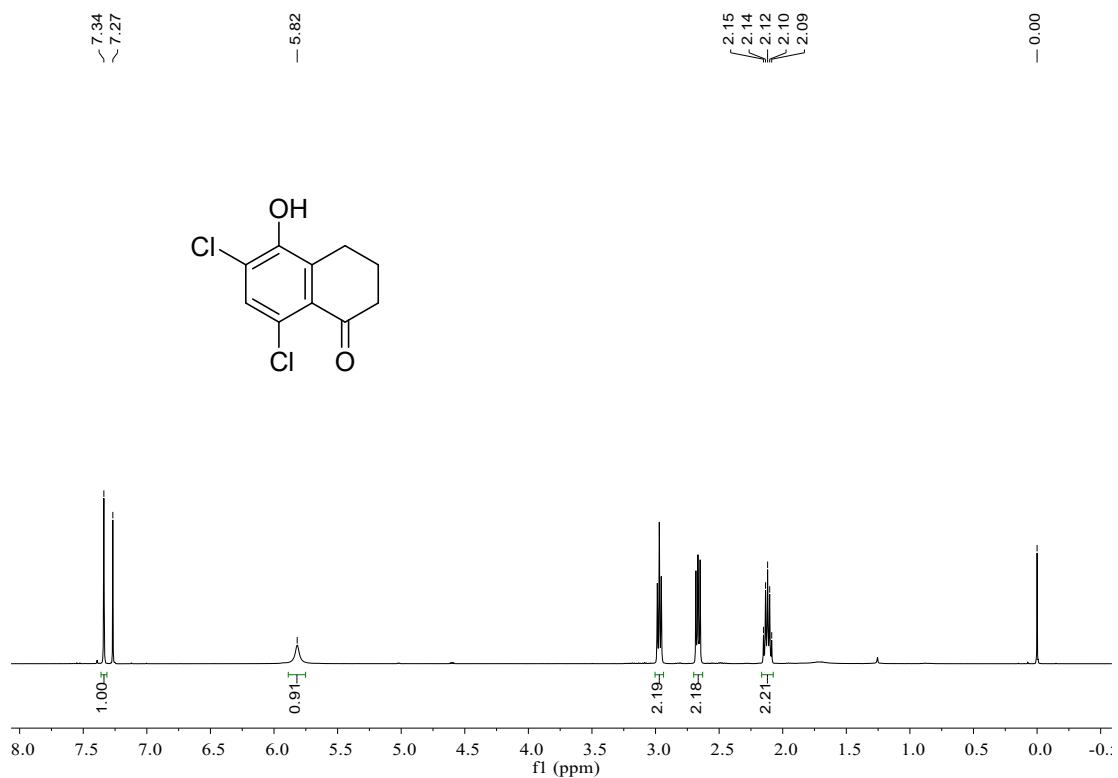

Figure S3  $^1\text{H NMR}$  of compound **5-hydroxy-6,8-dichlorotetralone**

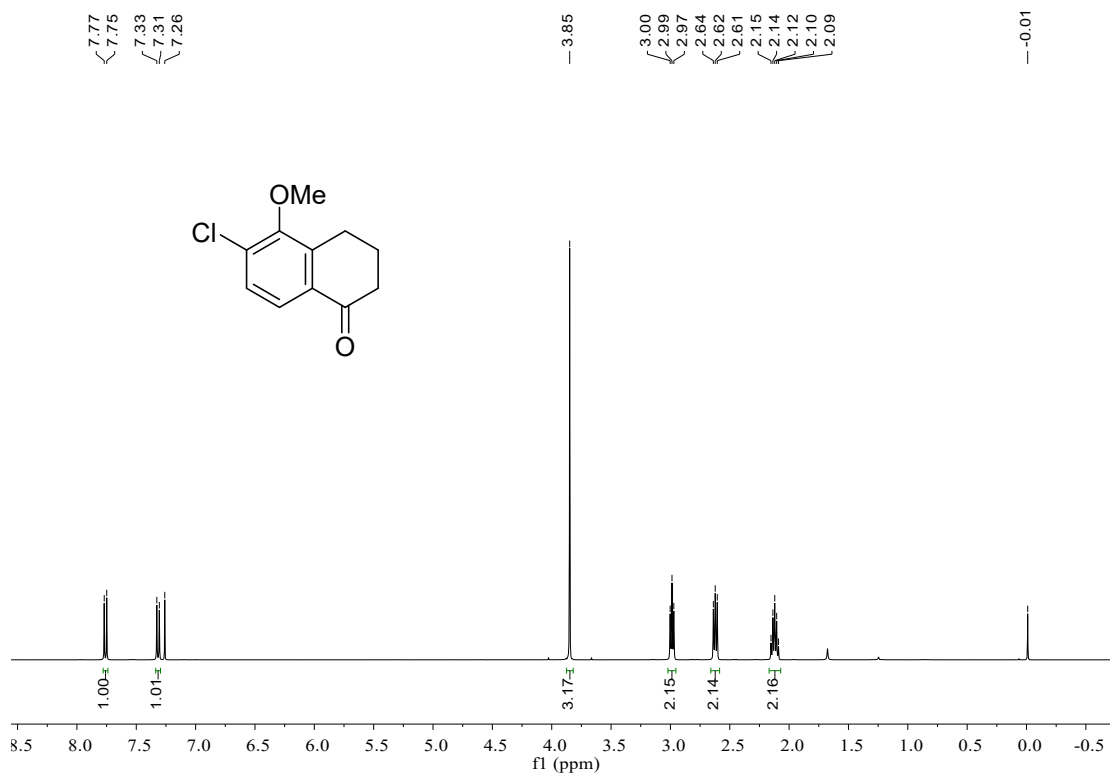

Figure S4  $^1\text{H NMR}$  Spectra of compound **7**

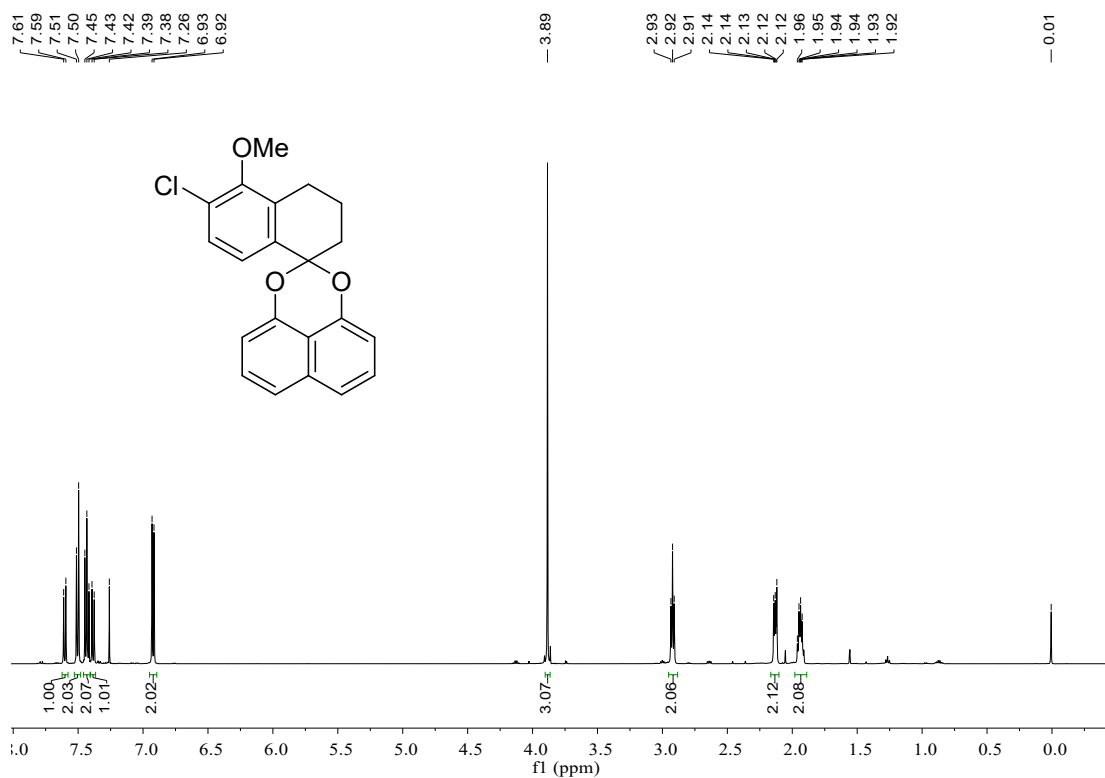

Figure S5 <sup>1</sup>H NMR Spectra of compound 9

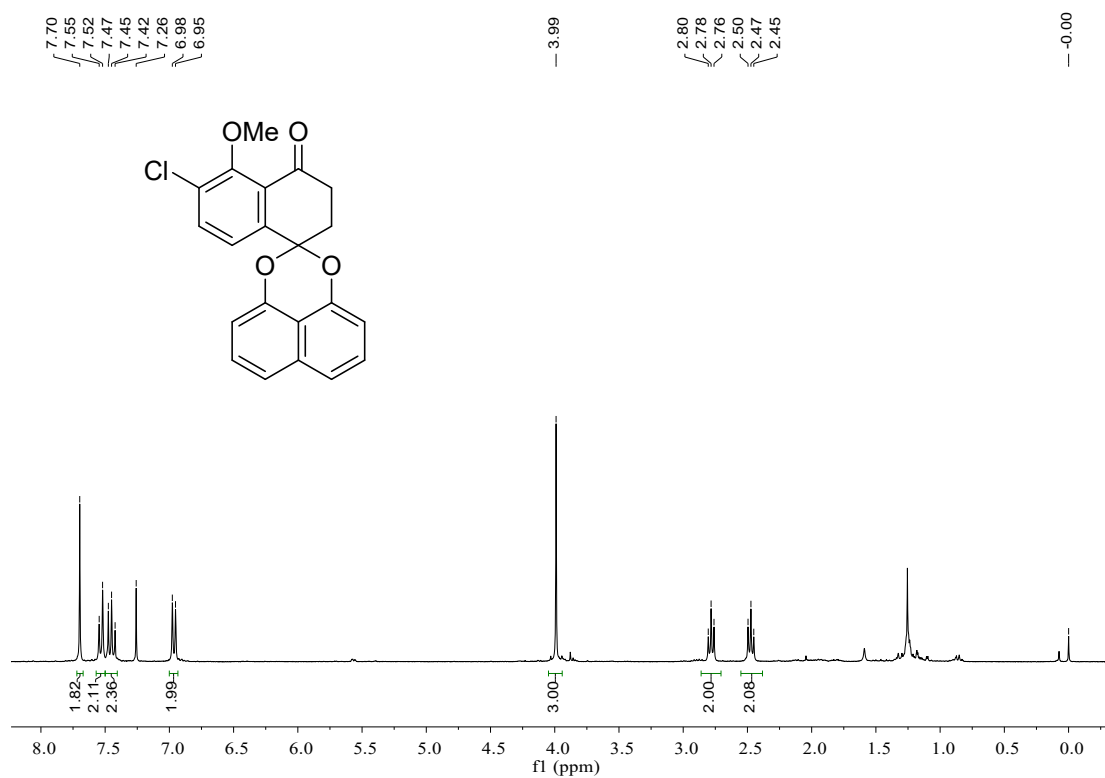

Figure S6 <sup>1</sup>H NMR Spectra of compound 10

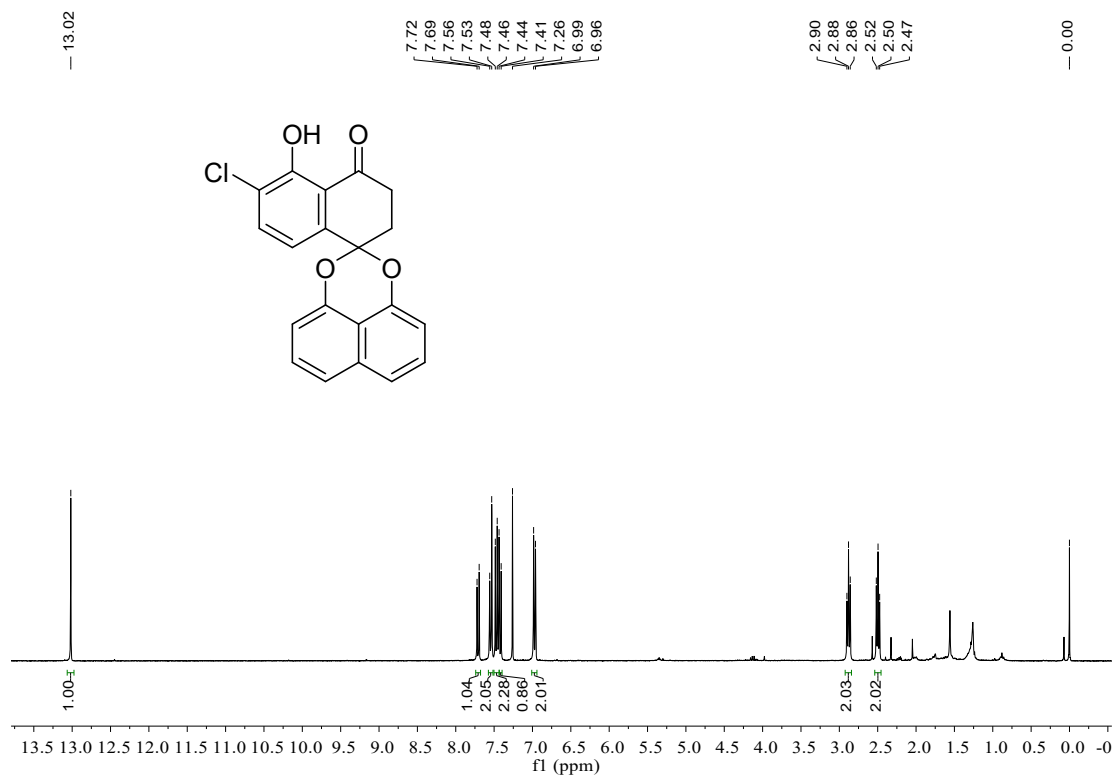

Figure S7  $^1\text{H}$  NMR Spectra of compound 2

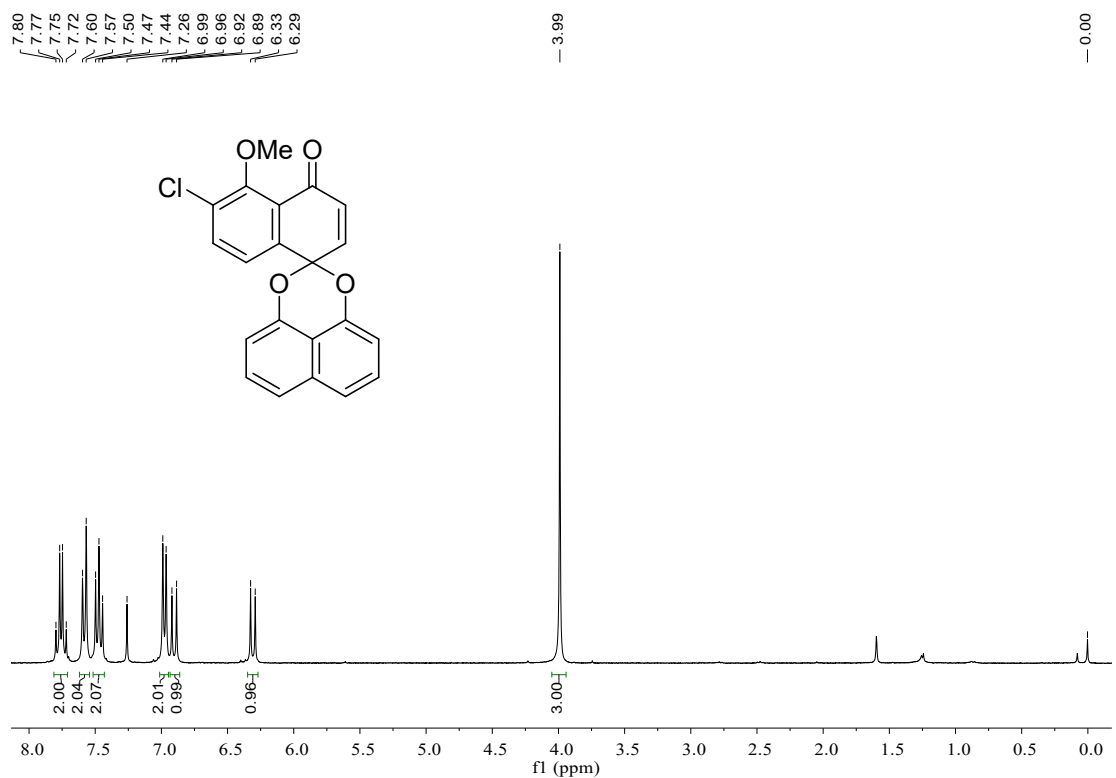

Figure S8  $^1\text{H}$  NMR Spectra of compound 11

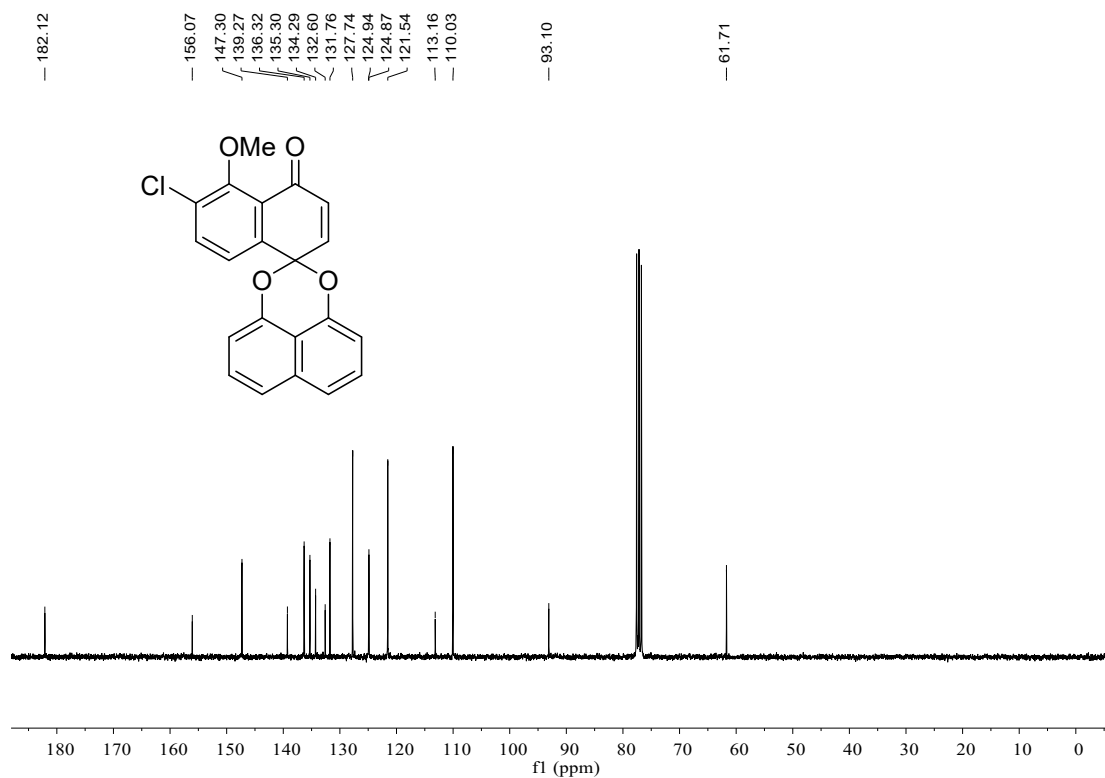

Figure S9  $^{13}\text{C}$  NMR Spectra of compound 11

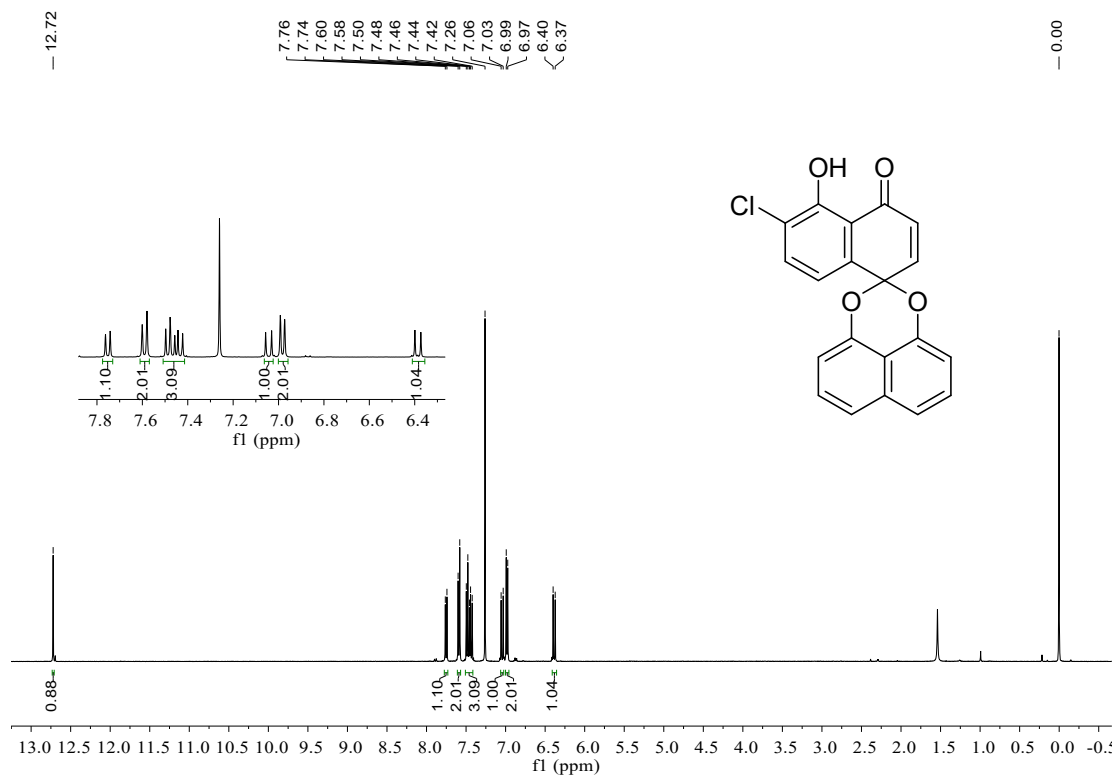

Figure S10  $^1\text{H}$  NMR Spectra of compound 12

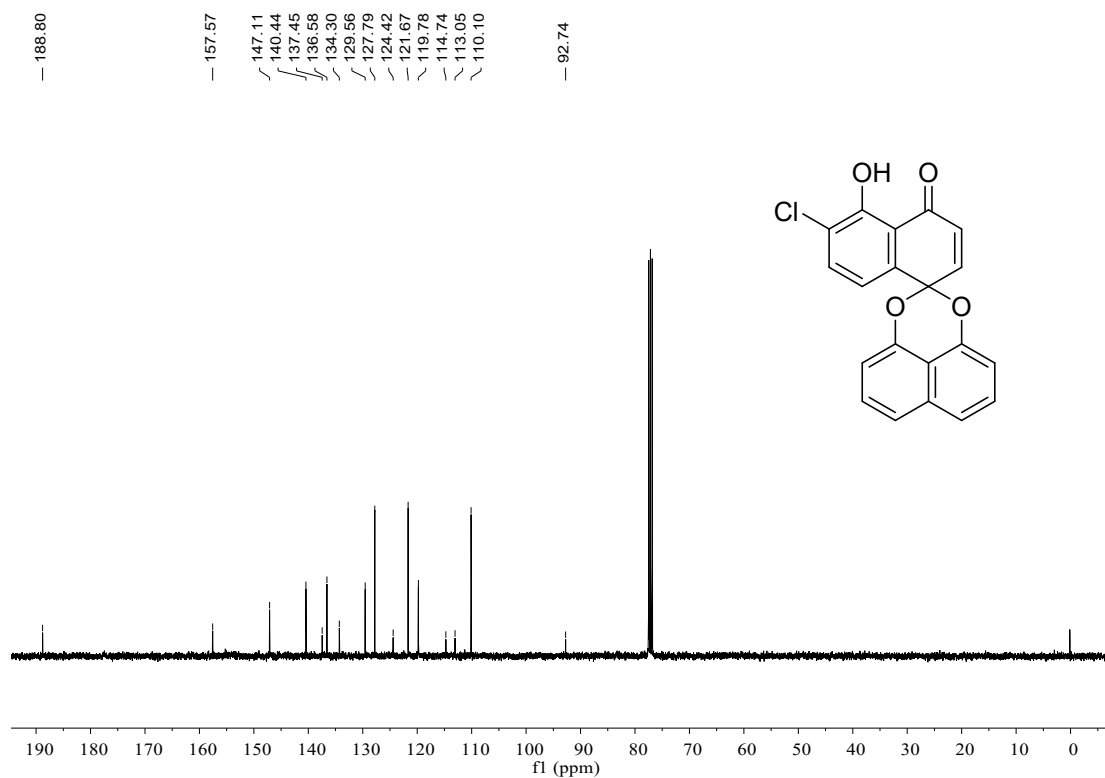

Figure S11  $^{13}\text{C}$  NMR Spectra of compound 12

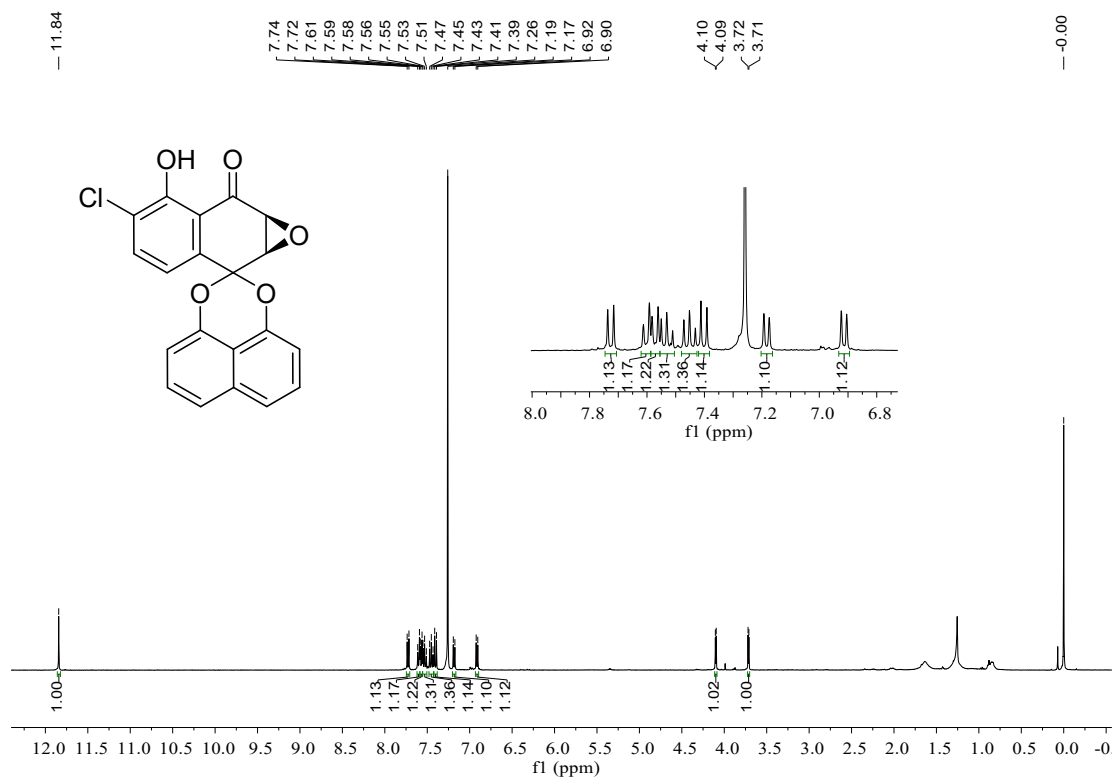

Figure S12  $^1\text{H}$  NMR Spectra of compound 13

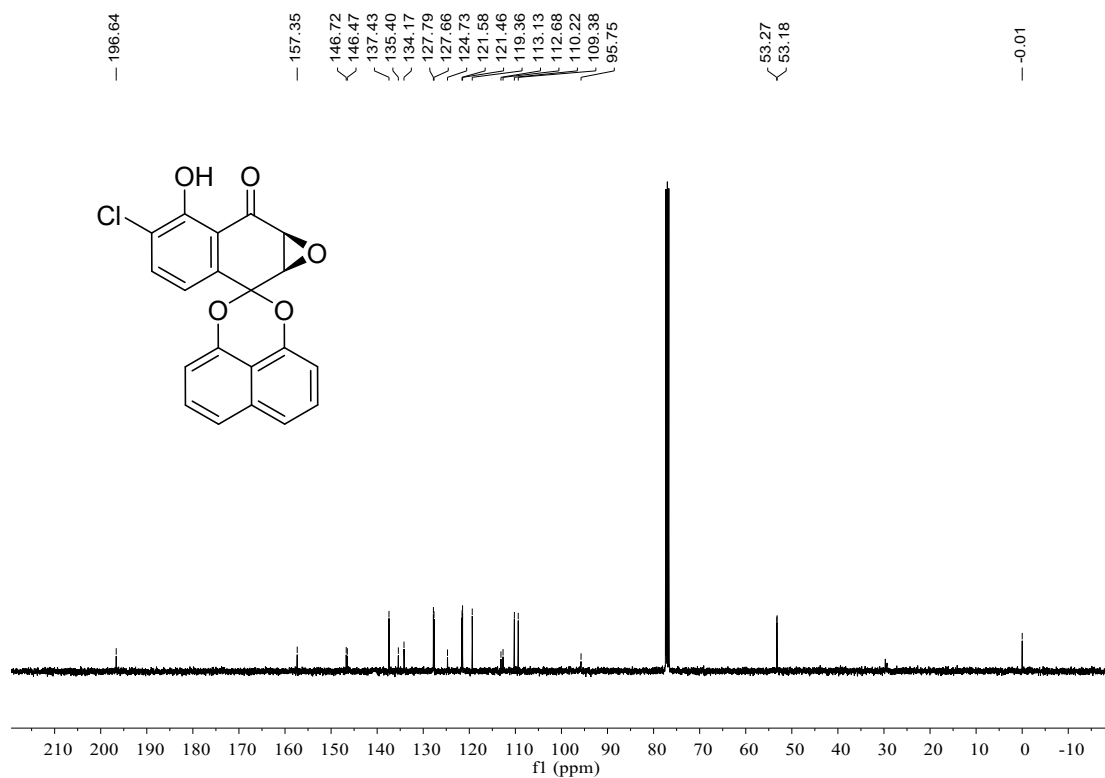

Figure S13  $^{13}\text{C}$  NMR Spectra of compound 13

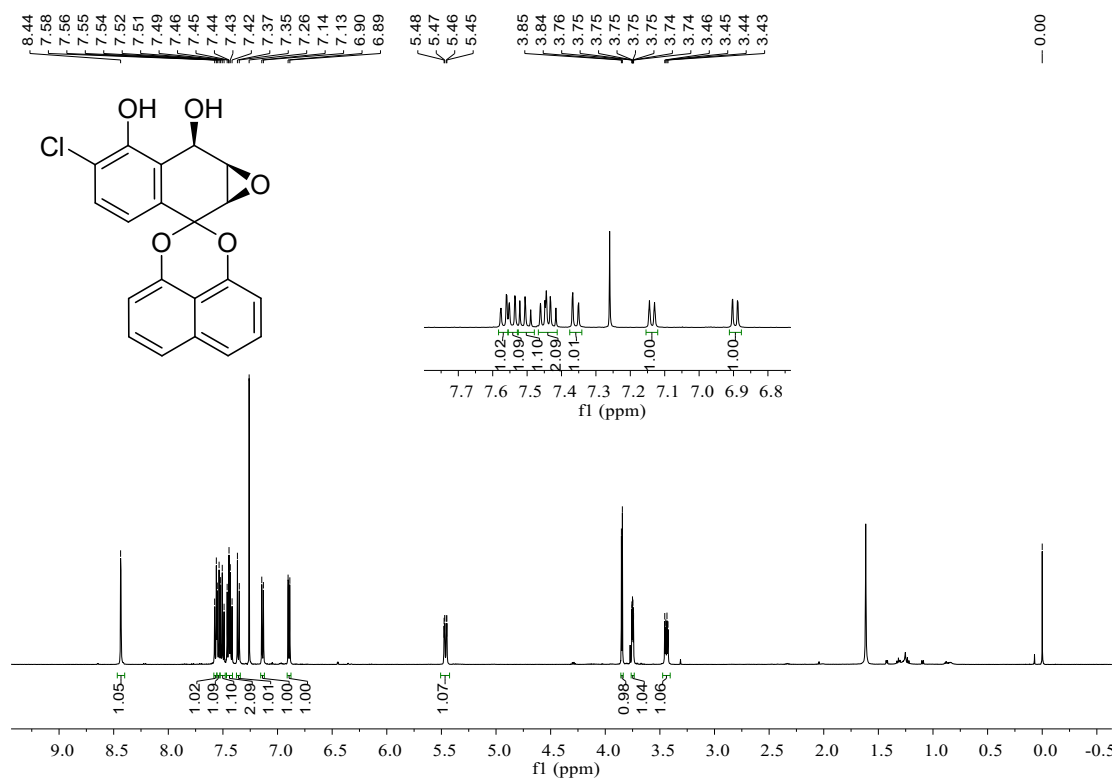

Figure S14  $^1\text{H}$  NMR Spectra of compound 1



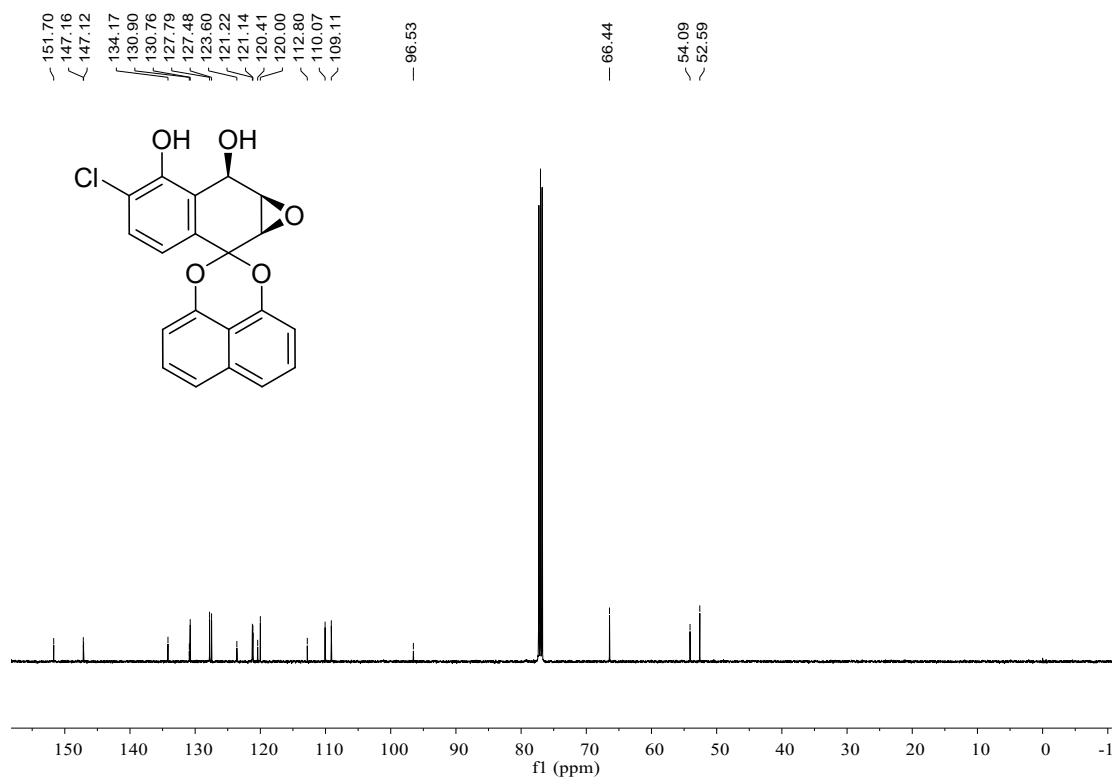

Figure S15  $^{13}\text{C}$  NMR Spectra of compound 1

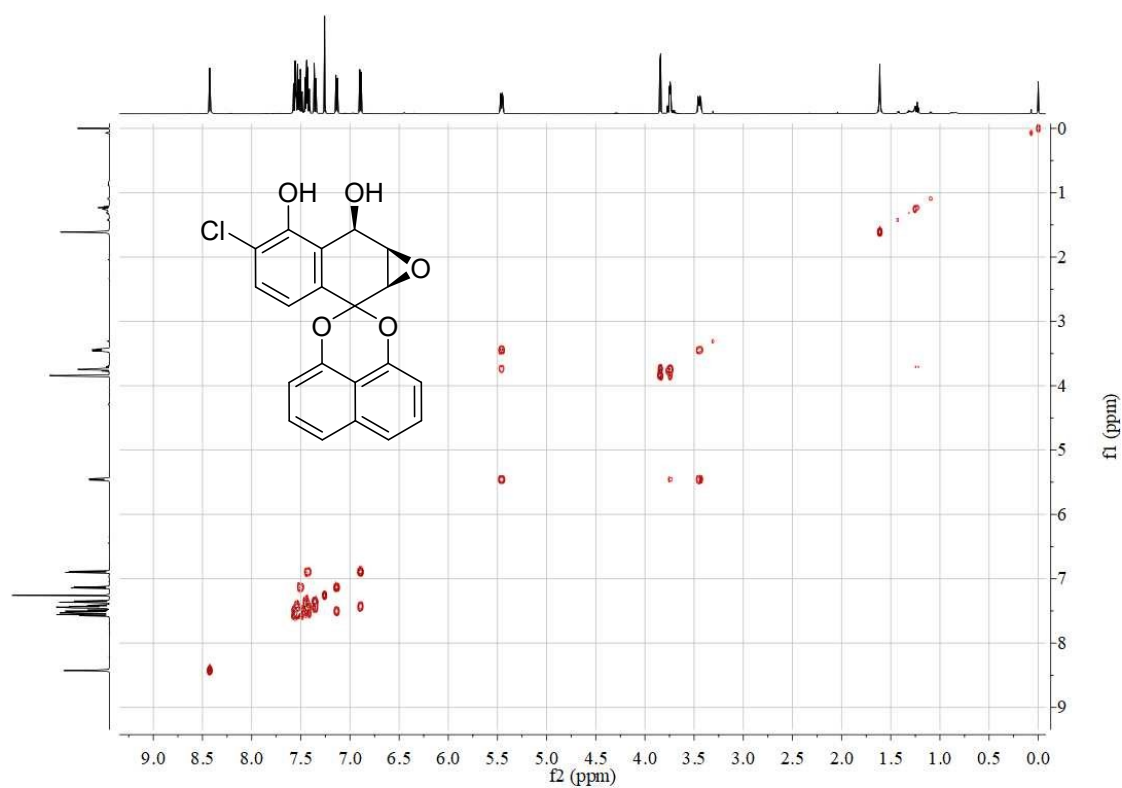

Figure S16 COSY (500MHz,  $\text{CDCl}_3$ ) Spectra of compound 1

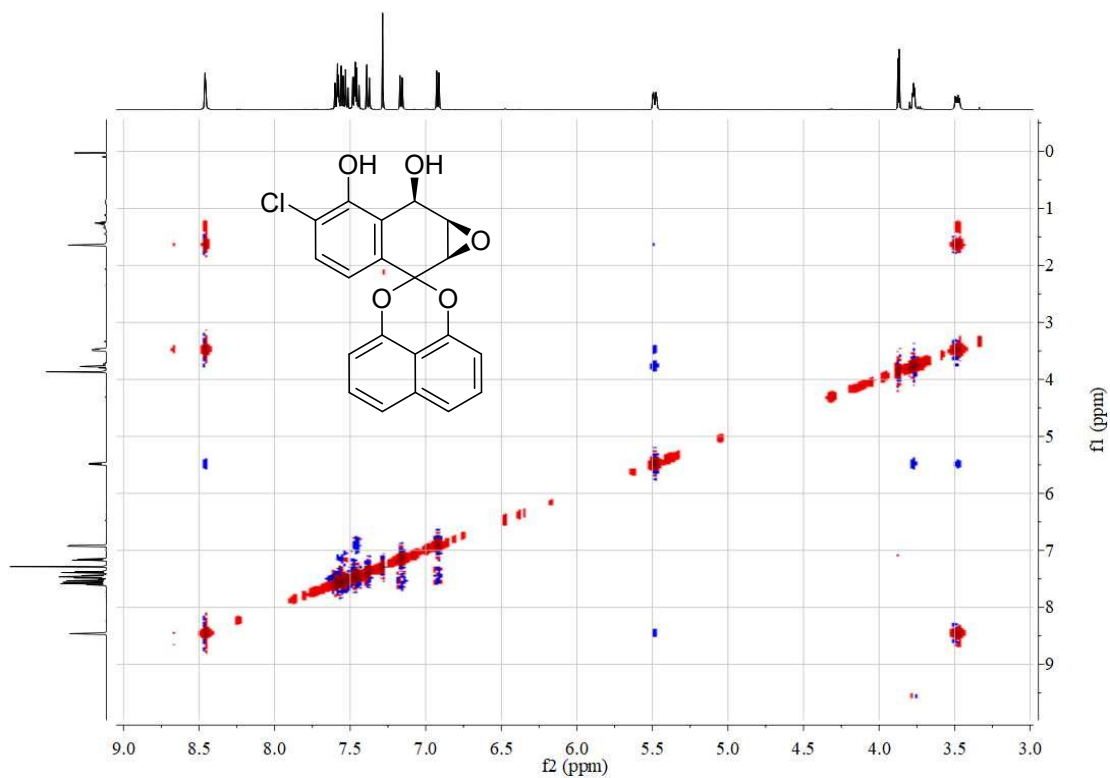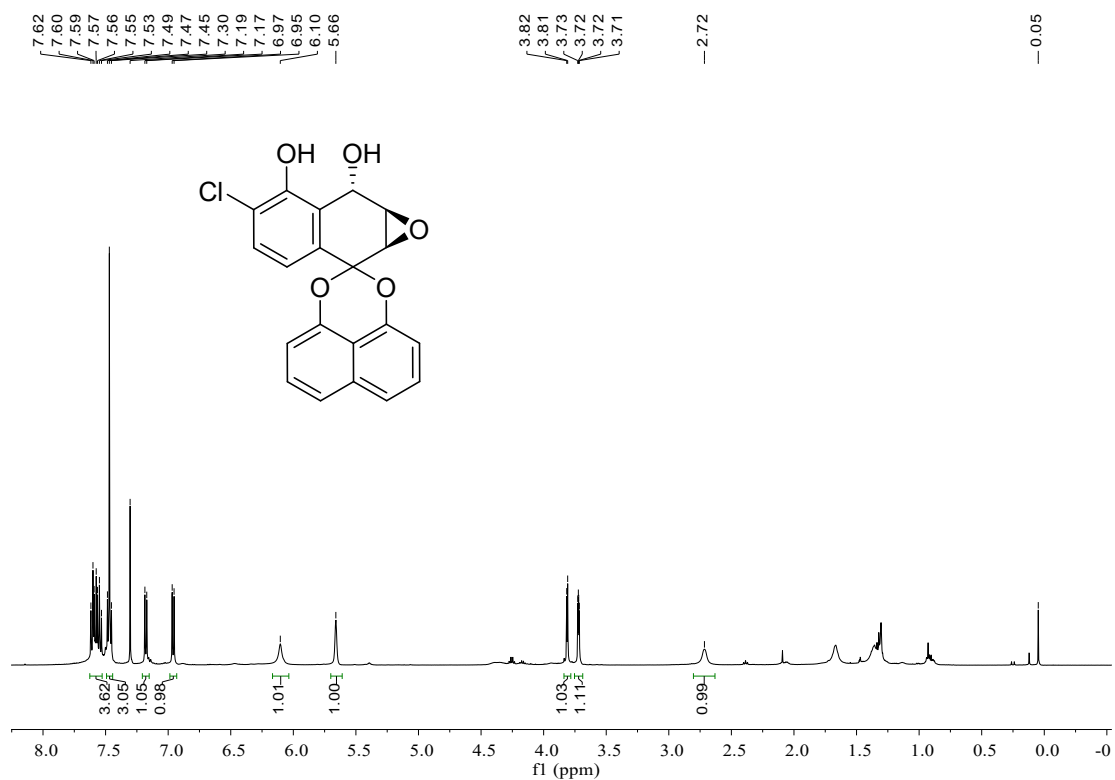

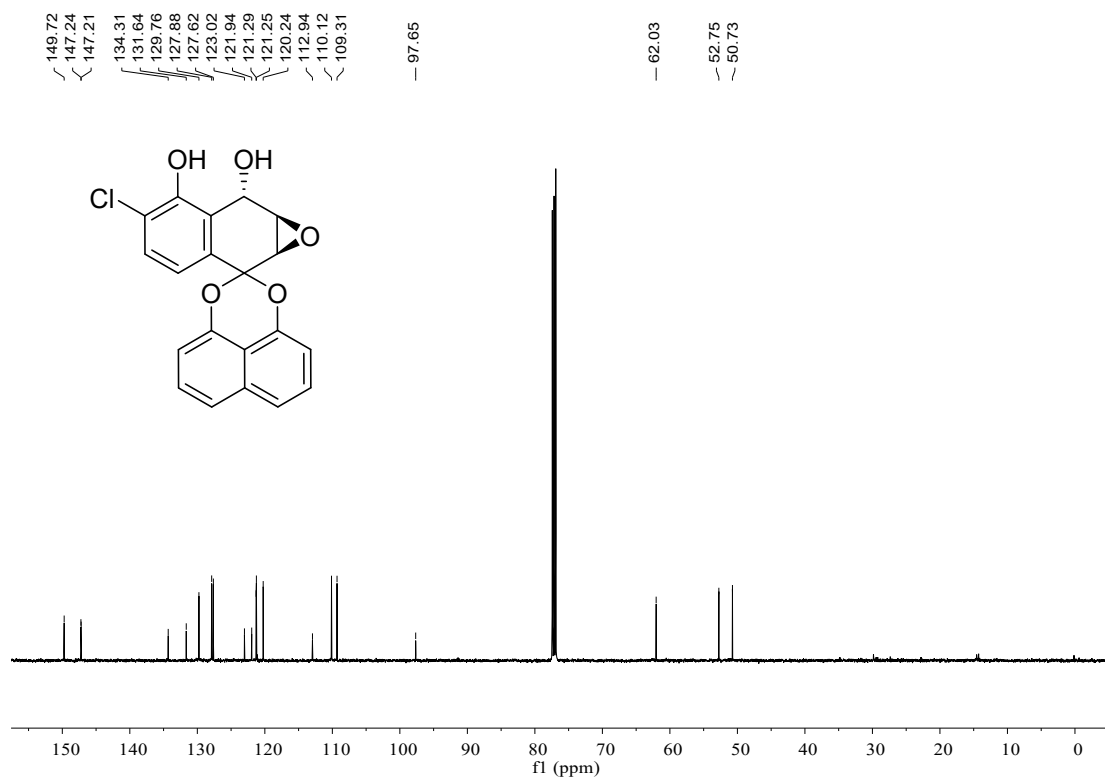

Figure S19  $^{13}\text{C}$  NMR Spectra of compound 14

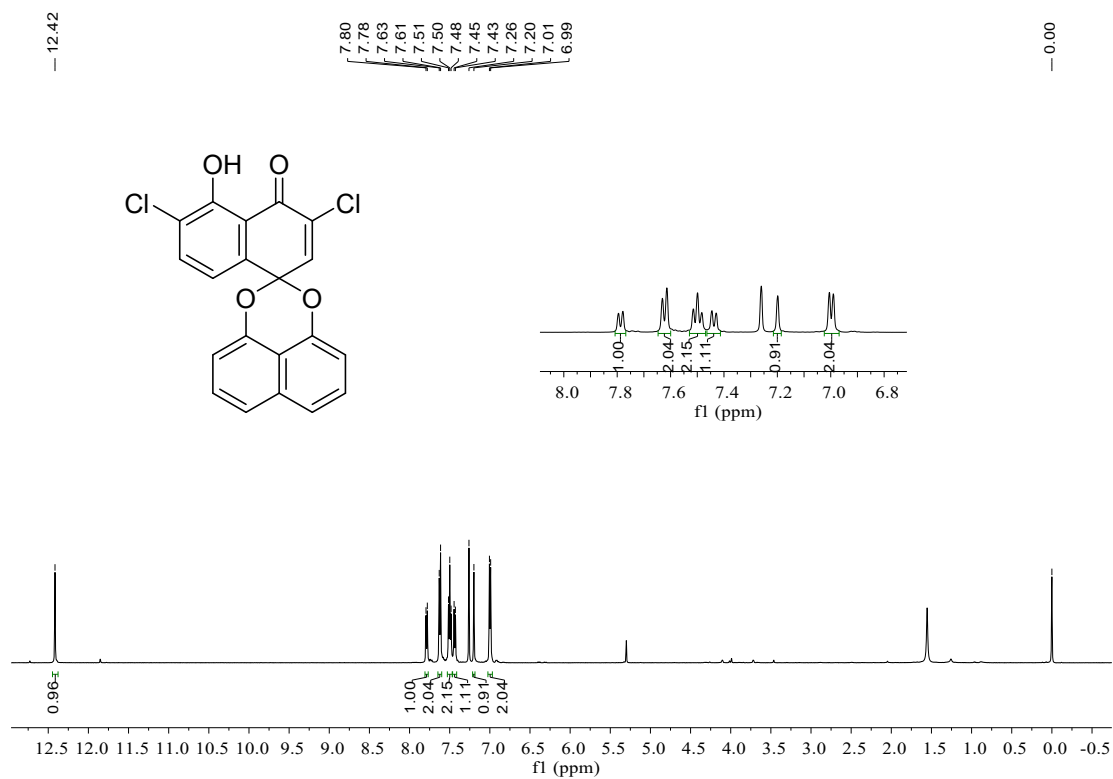

Figure S20  $^1\text{H}$  NMR Spectra of compound 4

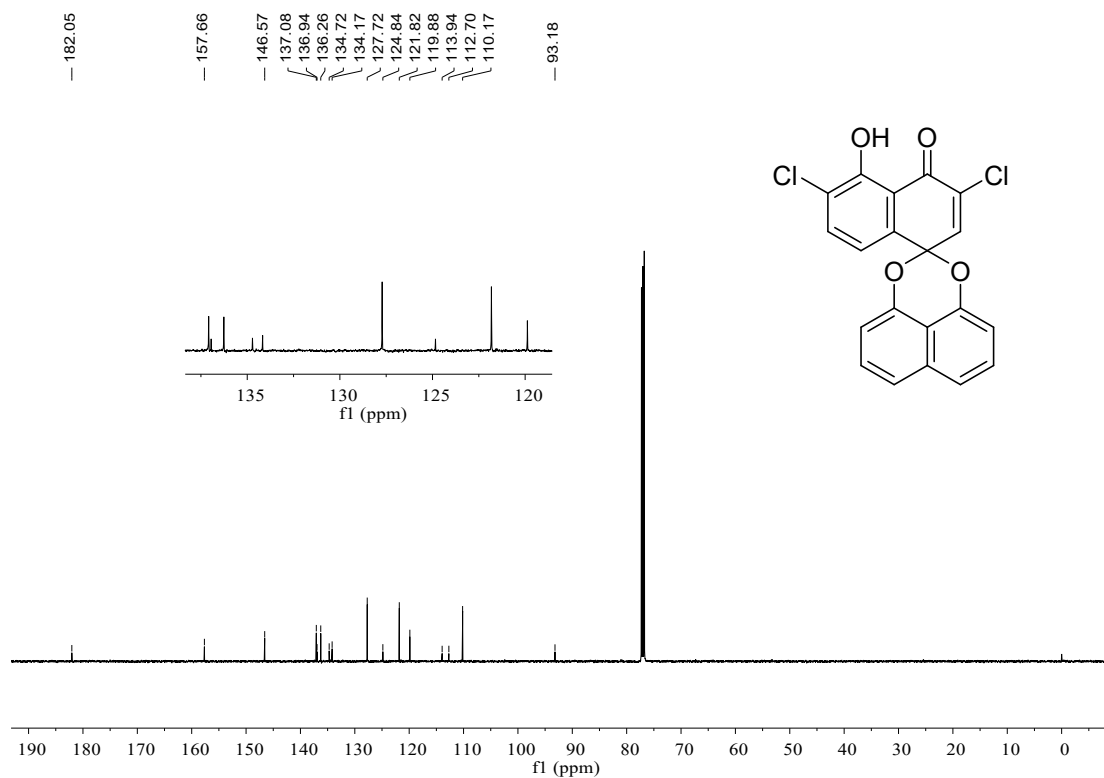

Figure S21  $^{13}\text{C}$  NMR Spectra of compound 4

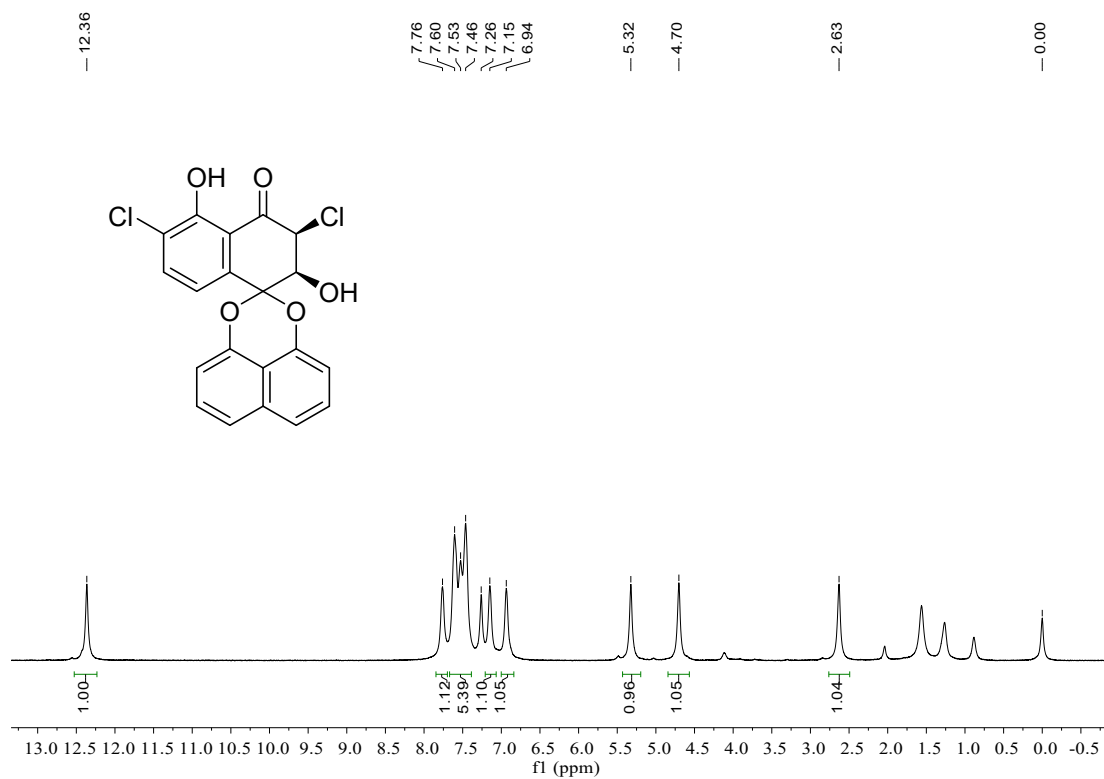

Figure S22  $^1\text{H}$  NMR Spectra of compound 15

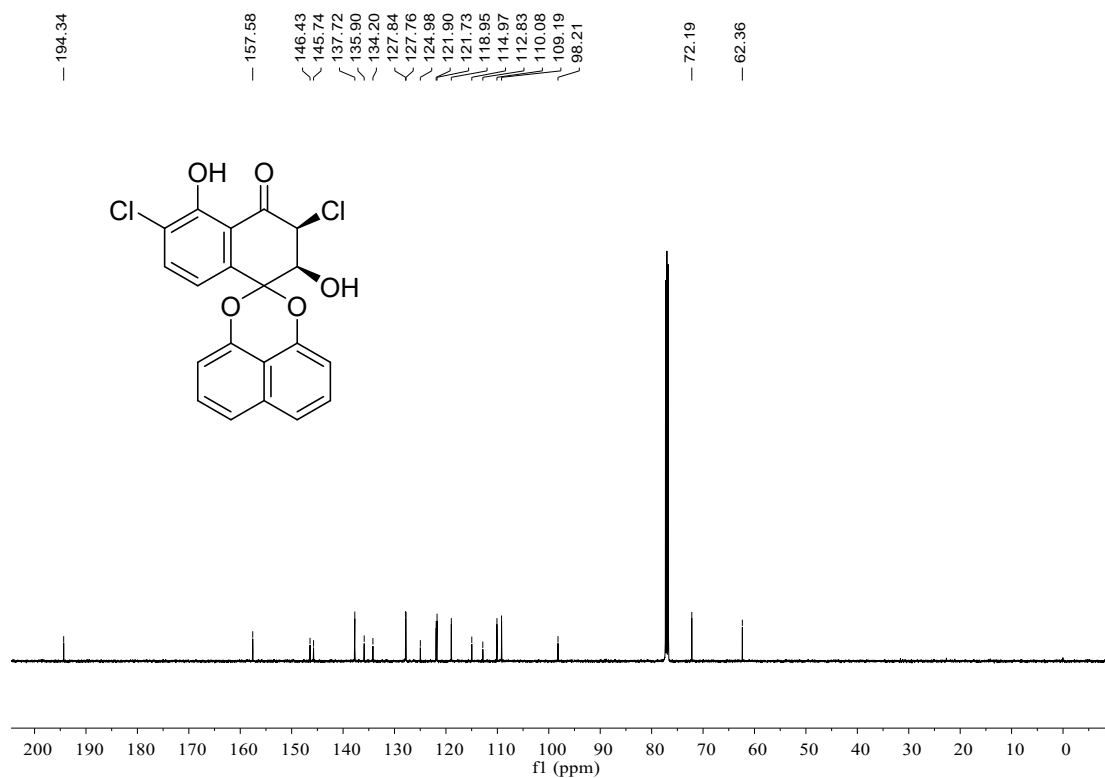

Figure S23  $^{13}\text{C}$  NMR Spectra of compound 15

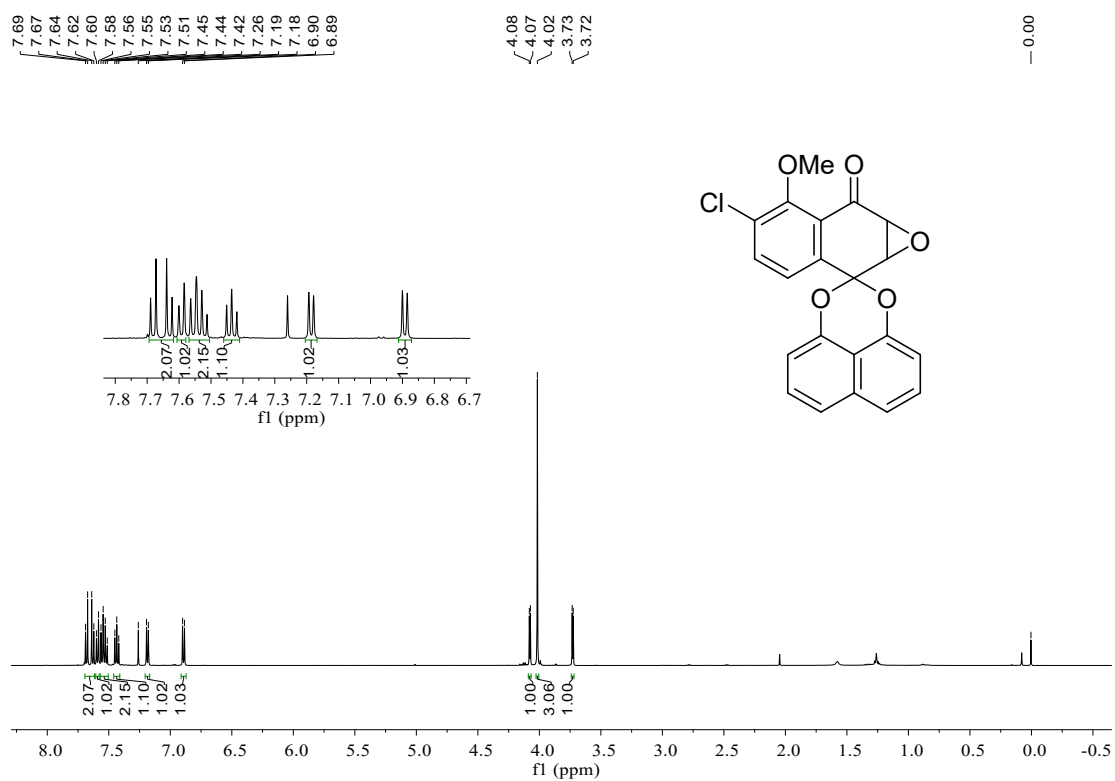

Figure S24  $^1\text{H}$  NMR Spectra of compound 16

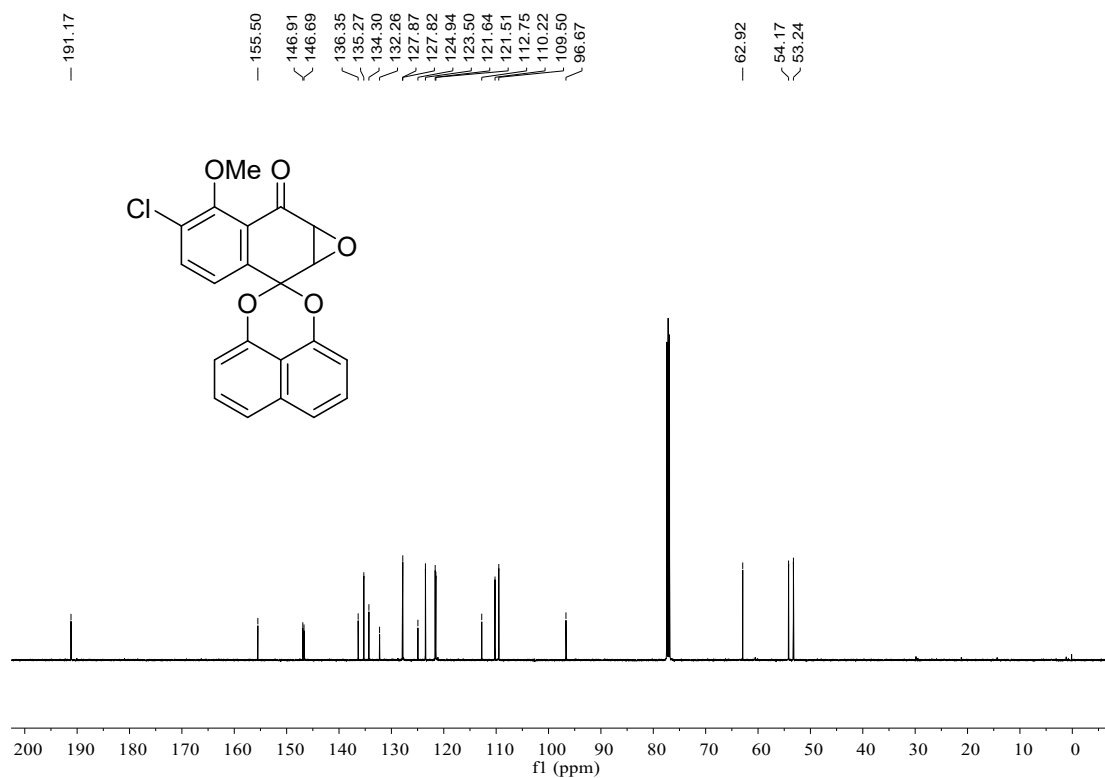

Figure S25  $^{13}\text{C}$  NMR Spectra of compound 16

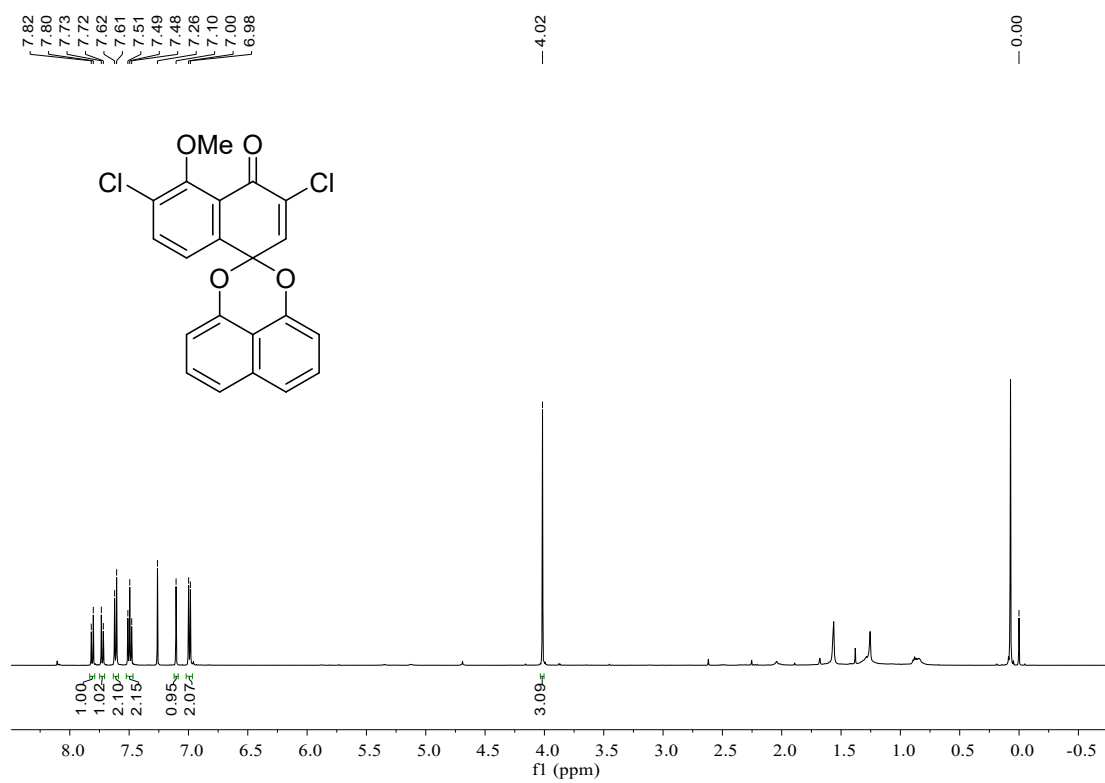

Figure S26  $^1\text{H}$  NMR Spectra of compound 17

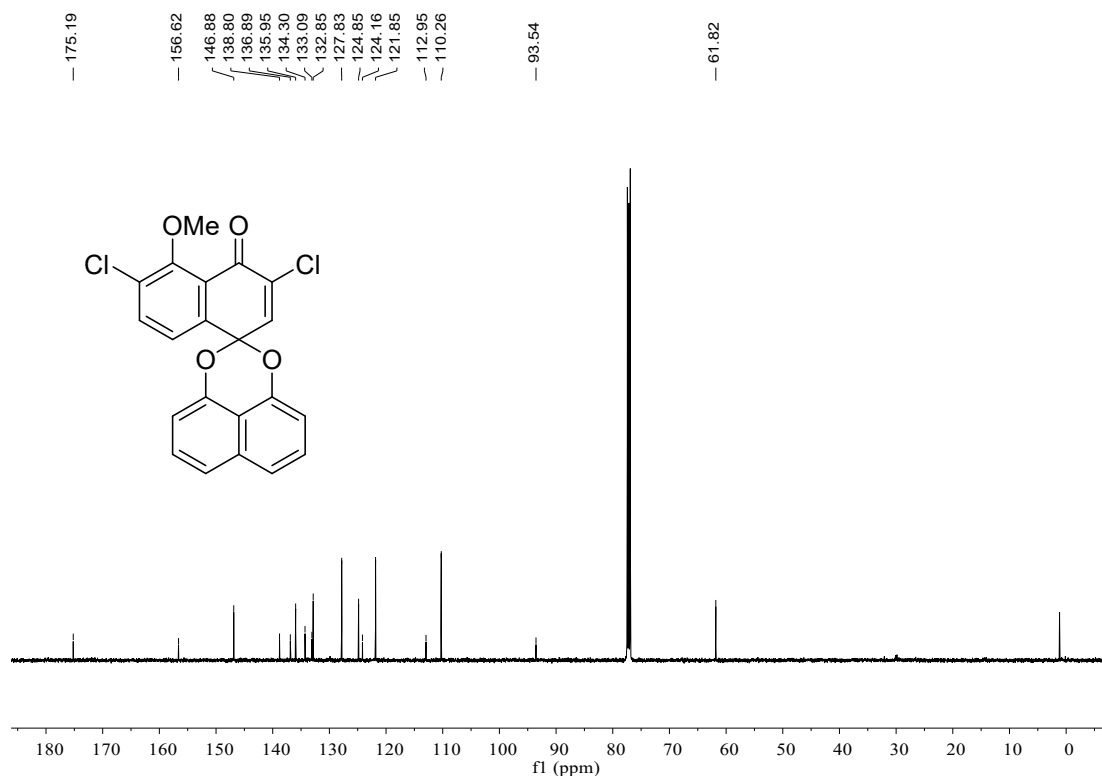

Figure S27 <sup>13</sup>C NMR Spectra of compound 17

Table S1 The <sup>1</sup>H, <sup>13</sup>C NMR chemical shifts of compounds 1, 14 and Sch 53825

| position | Sch 53825 (CDCl <sub>3</sub> ) |                     | compound 1 (CDCl <sub>3</sub> ) |                     | compound 14 (CDCl <sub>3</sub> ) |                     |
|----------|--------------------------------|---------------------|---------------------------------|---------------------|----------------------------------|---------------------|
|          | $\delta_{\text{H}}$ (J in Hz)  | $\delta_{\text{C}}$ | $\delta_{\text{H}}$ (J in Hz)   | $\delta_{\text{C}}$ | $\delta_{\text{H}}$ (J in Hz)    | $\delta_{\text{C}}$ |
| 1        | ---                            | 97.5                | ---                             | 96.53               | ---                              | 97.65               |
| 2        | 3.81 (d, 4.0)                  | 50.5                | 3.74-3.76 (m)                   | 52.59               | 3.81 (d, 3.9)                    | 50.73               |
| 3        | 3.72 (dd, 2.3, 4.0)            | 52.9                | 3.42-3.45 (m)                   | 54.09               | 3.72 (dd, 2.4, 3.9)              | 52.75               |
| 4        | 5.66 (brd, 2.3)                | 61.5                | 5.47 (dd, 2.5, 10)              | 66.44               | 5.66 (brs)                       | 62.03               |
| 4a       | ---                            | 122.3               | ---                             | 121.22              | ---                              | 121.94              |
| 5        | ---                            | 150.2               | ---                             | 151.70              | ---                              | 149.72              |
| 6        | ---                            | 123.4               | ---                             | 123.60              | ---                              | 123.02              |
| 7        | 7.44-7.48 (m)                  | 130.0               | 7.42-7.46 (m)                   | 130.76              | 7.45-7.49 (m)                    | 129.76              |
| 8        | 7.44-7.48 (m)                  | 120.1               | 7.42-7.46 (m)                   | 120.00              | 7.45-7.49 (m)                    | 120.24              |
| 8a       | ---                            | 131.3               | ---                             | 130.90              | ---                              | 131.64              |
| 1'       | ---                            | 147.3               | ---                             | 147.12              | ---                              | 147.21              |
| 2'       | 7.42-7.63 (m)                  | 121.2               | 7.51 (d, 7.5)                   | 121.14              | 7.45-7.49 (m)                    | 121.29              |
| 3'       | 7.42-7.63 (m)                  | 127.6               | 7.57 (d, 7.8)                   | 127.48              | 7.53-7.62 (m)                    | 127.62              |
| 4'       | 6.97 (d, 7.3)                  | 109.2               | 6.90 (d, 8.0)                   | 109.11              | 6.97 (d, 7.4)                    | 109.31              |
| 4a'      | ---                            | 134.3               | ---                             | 134.17              | ---                              | 134.31              |
| 5'       | 7.18 (d, 7.3)                  | 110.0               | 7.14 (d, 7.4)                   | 110.07              | 7.18 (d, 7.4)                    | 110.12              |
| 6'       | 7.42-7.63 (m)                  | 127.9               | 7.55 (d, 8.2)                   | 127.79              | 7.53-7.62 (m)                    | 127.88              |
| 7'       | 7.42-7.63 (m)                  | 121.2               | 7.37 (d, 8.4)                   | 120.41              | 7.53-7.62 (m)                    | 121.25              |
| 8'       | ---                            | 147.4               | ---                             | 147.16              | ---                              | 147.24              |
| 8a'      | ---                            | 112.9               | ---                             | 112.80              | ---                              | 112.94              |

## 2. High Resolution Mass Spectroscopy of Compounds 14 and 15

| Sample No.  | Formula (M)                                      | Ion Formula                                        | Measured m/z | Calc m/z | Diff (ppm) |
|-------------|--------------------------------------------------|----------------------------------------------------|--------------|----------|------------|
| Compound 14 | C <sub>20</sub> H <sub>13</sub> ClO <sub>5</sub> | C <sub>20</sub> H <sub>13</sub> ClNaO <sub>5</sub> | 391.0341     | 391.0344 | 0.77       |

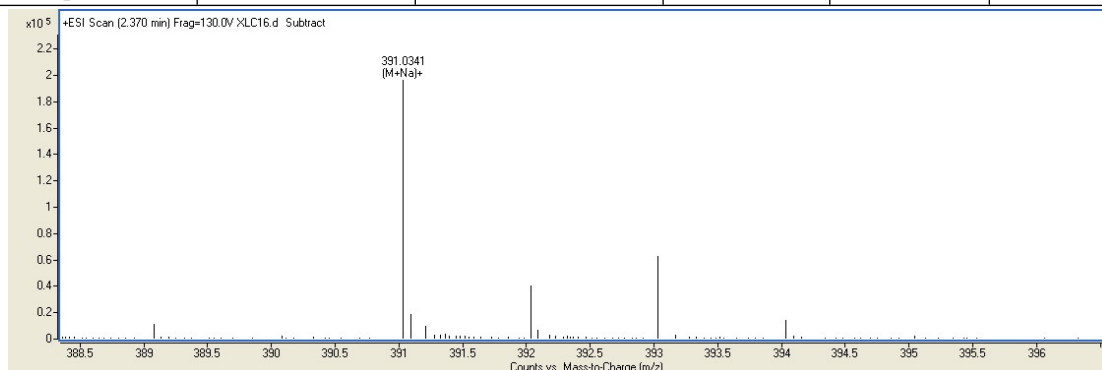

Figure S28 High resolution mass spectrometry report of compound 14

| Sample No.  | Formula (M)                                                    | Ion Formula                                                    | Measured m/z | Calc m/z | Diff (ppm) |
|-------------|----------------------------------------------------------------|----------------------------------------------------------------|--------------|----------|------------|
| Compound 15 | C <sub>20</sub> H <sub>12</sub> Cl <sub>2</sub> O <sub>5</sub> | C <sub>20</sub> H <sub>13</sub> Cl <sub>2</sub> O <sub>5</sub> | 403.0134     | 403.0135 | 0.25       |

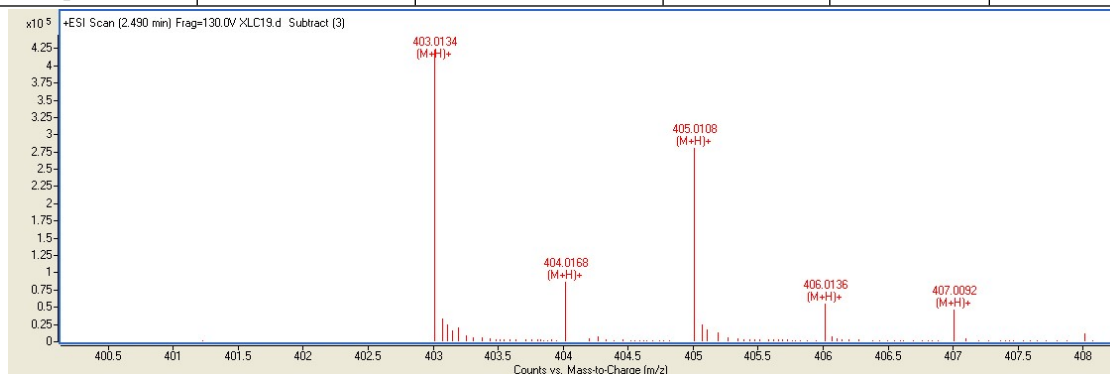

Figure S29 High resolution mass spectrometry report of compound 15



### 3. HPLC profiles of compound (±)- and (+)-13

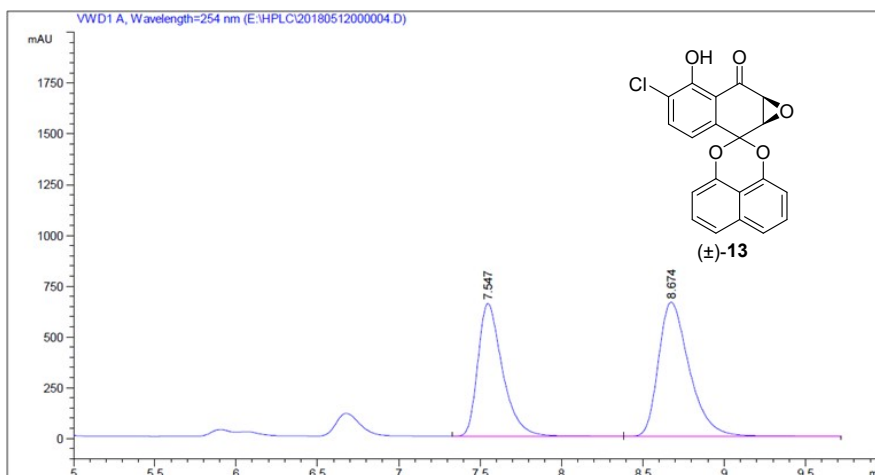

| Peak# | Ret. Time [min] | Area [mAU*s] | Height [mAU] | Conc. [%] |
|-------|-----------------|--------------|--------------|-----------|
| 1     | 7.547           | 7875.209     | 652.997      | 47.542    |
| 2     | 8.674           | 8689.386     | 659.877      | 52.458    |
| Total |                 | 16564.595    |              |           |

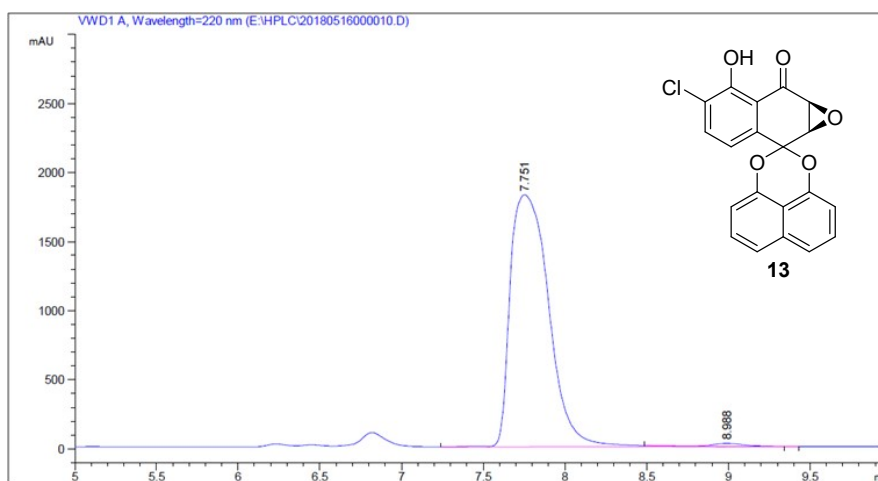

| Peak# | Ret. Time [min] | Area [mAU*s] | Height [mAU] | Conc. [%] |
|-------|-----------------|--------------|--------------|-----------|
| 1     | 7.751           | 3.0038e4     | 1824.567     | 98.716    |
| 2     | 8.988           | 390.8433     | 22.421       | 1.284     |
| Total |                 | 3.0428e4     |              |           |

Figure S30 HPLC profiles of compound (±)- and (+)-13

#### 4. The crystal structure parameters for compound 1

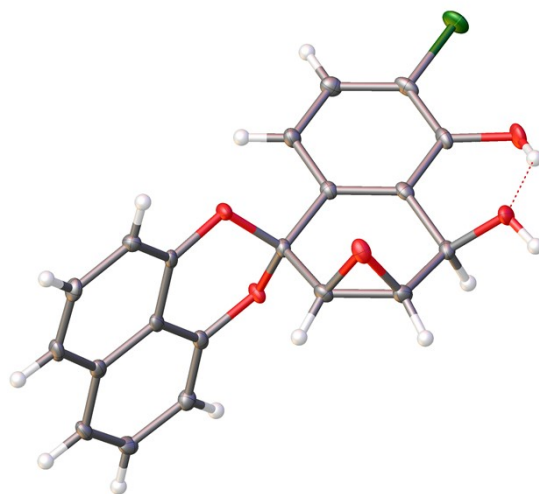

**Table 1:** Crystal data and structure refinement for exp\_8018 (CCDC ID 2169161)

|                                                                         |                                                   |
|-------------------------------------------------------------------------|---------------------------------------------------|
| Identification code                                                     | exp_8018                                          |
| Empirical formula                                                       | C <sub>20</sub> H <sub>13</sub> ClO <sub>5</sub>  |
| Formula weight                                                          | 368.75                                            |
| Temperature / K                                                         | 117.65(10)                                        |
| Crystal system                                                          | orthorhombic                                      |
| Space group                                                             | P2 <sub>1</sub> 2 <sub>1</sub> 2 <sub>1</sub>     |
| a / Å, b / Å, c / Å                                                     | 5.15545(11), 11.6040(2), 25.9405(5)               |
| α/°, β/°, γ/°                                                           | 90.00, 90.00, 90.00                               |
| Volume / Å <sup>3</sup>                                                 | 1551.86(5)                                        |
| Z                                                                       | 4                                                 |
| ρ <sub>calc</sub> / mg mm <sup>-3</sup>                                 | 1.578                                             |
| μ / mm <sup>-1</sup>                                                    | 2.466                                             |
| F(000)                                                                  | 760                                               |
| Crystal size / mm <sup>3</sup>                                          | 0.22 × 0.19 × 0.17                                |
| 2θ range for data collection                                            | 6.82 to 142.26°                                   |
| Index ranges                                                            | -6 ≤ h ≤ 6, -14 ≤ k ≤ 12, -31 ≤ l ≤ 17            |
| Reflections collected                                                   | 5497                                              |
| Independent reflections                                                 | 2944[R(int) = 0.0330 (inf-0.9Å)]                  |
| Data/restraints/parameters                                              | 2944/0/237                                        |
| Goodness-of-fit on F <sup>2</sup>                                       | 1.030                                             |
| Final R indexes [I > 2σ (I) i.e. F <sub>o</sub> > 4σ (F <sub>o</sub> )] | R <sub>1</sub> = 0.0369, wR <sub>2</sub> = 0.0942 |
| Final R indexes [all data]                                              | R <sub>1</sub> = 0.0386, wR <sub>2</sub> = 0.0962 |
| Largest diff. peak/hole / e Å <sup>-3</sup>                             | 0.243/-0.292                                      |
| Flack Parameters                                                        | 0.002(15)                                         |
| Completeness                                                            | 0.9982                                            |

Table 2 Fractional Atomic Coordinates ( $\times 10^4$ ) and Equivalent Isotropic Displacement Parameters ( $\text{\AA}^2 \times 10^3$ ) for exp\_8018.  $U_{\text{eq}}$  is defined as 1/3 of of the trace of the orthogonalised  $U_{\text{IJ}}$  tensor.

| Atom | x          | y          | z          | U(eq)     |
|------|------------|------------|------------|-----------|
| C11  | 8418.9(11) | 6475.1(5)  | 702.32(19) | 22.30(15) |
| O2   | 13372(3)   | 5652.6(12) | -1558.4(5) | 13.0(3)   |
| O5   | 12495(3)   | 4809.7(15) | 561.7(6)   | 20.0(4)   |
| C3   | 8297(4)    | 6328.7(17) | -336.8(8)  | 15.7(4)   |
| O4   | 14130(3)   | 2999.8(14) | 27.3(6)    | 15.5(3)   |
| O1   | 12684(3)   | 2664.1(13) | -1076.7(6) | 17.0(3)   |
| C6   | 12268(4)   | 4674.8(18) | -373.2(8)  | 12.8(4)   |
| O3   | 9748(3)    | 4406.9(13) | -1655.3(5) | 13.5(3)   |
| C16  | 12317(4)   | 4893.2(18) | -2396.5(8) | 12.3(4)   |
| C14  | 11199(5)   | 4086.2(19) | -3233.6(8) | 16.1(4)   |
| C2   | 9446(4)    | 5936.0(18) | 113.3(8)   | 16.0(4)   |
| C20  | 14772(4)   | 5536.6(18) | -3143.1(8) | 15.4(4)   |
| C4   | 9105(4)    | 5879.6(18) | -807.5(8)  | 14.0(4)   |
| C9   | 13746(4)   | 3630.6(18) | -1348.6(8) | 13.9(4)   |
| C1   | 11422(4)   | 5121.5(18) | 104.1(8)   | 14.1(4)   |
| C12  | 8833(4)    | 3504.8(19) | -2464.5(8) | 14.2(4)   |
| C19  | 16245(4)   | 6223.1(18) | -2825.9(8) | 15.8(4)   |
| C5   | 11087(4)   | 5059.3(17) | -826.8(8)  | 12.0(4)   |
| C11  | 10289(4)   | 4242.6(17) | -2173.7(7) | 11.9(4)   |
| C18  | 15815(4)   | 6267.6(18) | -2288.4(8) | 14.8(4)   |
| C7   | 14556(4)   | 3852.0(18) | -375.4(8)  | 13.3(4)   |
| C15  | 12776(4)   | 4836.3(18) | -2935.8(8) | 13.7(4)   |
| C8   | 14964(4)   | 3235.9(18) | -877.0(8)  | 15.0(4)   |
| C10  | 12005(4)   | 4679.3(17) | -1353.2(8) | 11.7(4)   |
| C17  | 13878(4)   | 5606.4(17) | -2083.6(7) | 12.5(4)   |
| C13  | 9315(4)    | 3441(2)    | -3003.0(8) | 16.0(4)   |

Table 3 Anisotropic Displacement Parameters ( $\text{\AA}^2 \times 10^3$ ) for exp\_8018. The Anisotropic displacement factor exponent takes the form:  $-2\pi^2[h^2a^*2U_{11}+\dots+2hka \times b \times U_{12}]$

| Atom | $U_{11}$ | $U_{22}$ | $U_{33}$ | $U_{23}$  | $U_{13}$ | $U_{12}$ |
|------|----------|----------|----------|-----------|----------|----------|
| C11  | 28.7(3)  | 25.5(3)  | 12.7(2)  | -6.32(19) | 7.6(2)   | 1.7(2)   |
| O2   | 17.0(7)  | 14.8(7)  | 7.4(6)   | 0.0(5)    | 0.3(6)   | -3.5(6)  |
| O5   | 26.3(8)  | 26.0(8)  | 7.6(7)   | -1.1(6)   | -2.3(6)  | 1.8(7)   |
| C3   | 17.4(10) | 12.8(9)  | 16.8(10) | 0.1(8)    | 2.7(9)   | 1.4(8)   |
| O4   | 16.2(7)  | 18.2(7)  | 12.1(7)  | 6.2(6)    | 0.8(6)   | 2.7(6)   |
| O1   | 25.2(8)  | 13.6(7)  | 12.1(7)  | 0.0(5)    | -0.3(6)  | -0.8(6)  |
| C6   | 15.2(9)  | 12.6(9)  | 10.7(9)  | 1.1(7)    | 2.0(8)   | -3.8(8)  |

|     |          |          |          |         |         |         |
|-----|----------|----------|----------|---------|---------|---------|
| O3  | 11.9(7)  | 20.2(7)  | 8.3(7)   | 0.5(5)  | 0.0(6)  | -1.2(6) |
| C16 | 13.7(9)  | 12.9(9)  | 10.3(9)  | 3.1(7)  | 0.0(7)  | 4.4(7)  |
| C14 | 20.0(11) | 20.1(10) | 8.1(9)   | -0.4(8) | -0.9(8) | 4.9(9)  |
| C2  | 21.2(10) | 15.4(10) | 11.5(9)  | -5.1(8) | 5.7(9)  | -5.0(8) |
| C20 | 18.6(10) | 17.5(10) | 9.9(9)   | 3.8(8)  | 3.3(8)  | 3.6(9)  |
| C4  | 16.3(10) | 14.2(9)  | 11.4(9)  | 1.8(8)  | 0.9(8)  | 2.2(8)  |
| C9  | 16(1)    | 15.6(9)  | 10.2(9)  | -1.4(8) | 3.0(8)  | 0.5(8)  |
| C1  | 18.1(9)  | 16.2(9)  | 7.9(9)   | -0.5(7) | -0.7(8) | -5.4(8) |
| C12 | 13.2(9)  | 16.6(9)  | 12.8(9)  | 0.3(8)  | 1.3(8)  | 1.4(9)  |
| C19 | 15(1)    | 14.8(9)  | 17.7(10) | 7.6(8)  | 3.5(8)  | 1.2(7)  |
| C5  | 13.3(10) | 12.4(9)  | 10.4(9)  | 0.1(7)  | 0.0(8)  | -1.3(7) |
| C11 | 13.0(9)  | 14.6(9)  | 8.0(9)   | 1.7(8)  | -1.4(8) | 4.0(8)  |
| C18 | 15.7(10) | 13.4(9)  | 15.2(10) | 2.0(7)  | -2.0(8) | 0.5(7)  |
| C7  | 13.4(10) | 15.6(9)  | 10.8(9)  | 2.7(8)  | -1.2(8) | -2.2(8) |
| C15 | 14.3(10) | 15.2(9)  | 11.4(9)  | 0.8(7)  | 0.2(8)  | 5.9(8)  |
| C8  | 14.8(9)  | 15.8(10) | 14.4(10) | 2.3(8)  | 2.6(8)  | 3.1(8)  |
| C10 | 12.9(10) | 12.6(9)  | 9.5(9)   | 1.4(7)  | -1.5(8) | -0.5(7) |
| C17 | 15.1(10) | 12.5(9)  | 9.8(9)   | 1.2(7)  | 0.4(8)  | 3.9(7)  |
| C13 | 17.9(10) | 17.3(10) | 13.0(9)  | -2.3(8) | -5.0(8) | 1.1(9)  |

Table 4 Bond Lengths for exp\_8018.

| Atom | Atom | Length/Å | Atom | Atom | Length/Å |
|------|------|----------|------|------|----------|
| C11  | C2   | 1.734(2) | C16  | C17  | 1.411(3) |
| O2   | C10  | 1.434(2) | C14  | C15  | 1.420(3) |
| O2   | C17  | 1.388(2) | C14  | C13  | 1.364(3) |
| O5   | C1   | 1.359(3) | C2   | C1   | 1.390(3) |
| C3   | C2   | 1.386(3) | C20  | C19  | 1.374(3) |
| C3   | C4   | 1.391(3) | C20  | C15  | 1.417(3) |
| O4   | C7   | 1.455(3) | C4   | C5   | 1.397(3) |
| O1   | C9   | 1.434(3) | C9   | C8   | 1.449(3) |
| O1   | C8   | 1.446(3) | C9   | C10  | 1.512(3) |
| C6   | C1   | 1.411(3) | C12  | C11  | 1.366(3) |
| C6   | C5   | 1.398(3) | C12  | C13  | 1.421(3) |
| C6   | C7   | 1.518(3) | C19  | C18  | 1.413(3) |
| O3   | C11  | 1.387(2) | C5   | C10  | 1.511(3) |
| O3   | C10  | 1.438(2) | C18  | C17  | 1.366(3) |
| C16  | C11  | 1.413(3) | C7   | C8   | 1.500(3) |
| C16  | C15  | 1.420(3) |      |      |          |

Table 5 Bond Angles for exp\_8018.

| Atom | Atom | Atom | Angle/° | Atom | Atom | Atom | Angle/° |
|------|------|------|---------|------|------|------|---------|
|------|------|------|---------|------|------|------|---------|

|     |     |     |            |     |     |     |            |
|-----|-----|-----|------------|-----|-----|-----|------------|
| C17 | O2  | C10 | 115.24(15) | C4  | C5  | C6  | 120.38(19) |
| C2  | C3  | C4  | 119.2(2)   | C4  | C5  | C10 | 117.39(18) |
| C9  | O1  | C8  | 60.44(13)  | O3  | C11 | C16 | 118.18(18) |
| C1  | C6  | C7  | 118.33(19) | C12 | C11 | O3  | 120.74(19) |
| C5  | C6  | C1  | 119.1(2)   | C12 | C11 | C16 | 121.03(19) |
| C5  | C6  | C7  | 122.41(19) | C17 | C18 | C19 | 118.5(2)   |
| C11 | O3  | C10 | 113.32(16) | O4  | C7  | C6  | 107.91(16) |
| C11 | C16 | C15 | 120.08(19) | O4  | C7  | C8  | 108.67(17) |
| C17 | C16 | C11 | 120.00(18) | C8  | C7  | C6  | 114.36(18) |
| C17 | C16 | C15 | 119.92(19) | C14 | C15 | C16 | 118.0(2)   |
| C13 | C14 | C15 | 120.38(19) | C20 | C15 | C16 | 117.9(2)   |
| C3  | C2  | C11 | 119.54(17) | C20 | C15 | C14 | 124.13(19) |
| C3  | C2  | C1  | 121.49(19) | O1  | C8  | C9  | 59.36(13)  |
| C1  | C2  | C11 | 118.97(17) | O1  | C8  | C7  | 114.55(17) |
| C19 | C20 | C15 | 120.42(19) | C9  | C8  | C7  | 121.39(19) |
| C3  | C4  | C5  | 120.4(2)   | O2  | C10 | O3  | 111.63(15) |
| O1  | C9  | C8  | 60.20(13)  | O2  | C10 | C9  | 110.16(16) |
| O1  | C9  | C10 | 113.98(17) | O2  | C10 | C5  | 105.05(16) |
| C8  | C9  | C10 | 121.21(18) | O3  | C10 | C9  | 107.93(16) |
| O5  | C1  | C6  | 122.9(2)   | O3  | C10 | C5  | 107.66(16) |
| O5  | C1  | C2  | 117.67(19) | C5  | C10 | C9  | 114.44(17) |
| C2  | C1  | C6  | 119.42(19) | O2  | C17 | C16 | 118.69(19) |
| C11 | C12 | C13 | 118.7(2)   | C18 | C17 | O2  | 119.80(19) |
| C20 | C19 | C18 | 121.7(2)   | C18 | C17 | C16 | 121.49(19) |
| C6  | C5  | C10 | 122.09(19) | C14 | C13 | C12 | 121.8(2)   |

Table 6 Torsion Angles for exp\_8018.

| <b>A</b> | <b>B</b> | <b>C</b> | <b>D</b> | <b>Angle/°</b> |
|----------|----------|----------|----------|----------------|
| C11      | C2       | C1       | O5       | -1.6(3)        |
| C11      | C2       | C1       | C6       | 179.81(16)     |
| C3       | C2       | C1       | O5       | 178.0(2)       |
| C3       | C2       | C1       | C6       | -0.6(3)        |
| C3       | C4       | C5       | C6       | 0.5(3)         |
| C3       | C4       | C5       | C10      | -175.34(18)    |
| O4       | C7       | C8       | O1       | 68.9(2)        |
| O4       | C7       | C8       | C9       | 136.7(2)       |
| O1       | C9       | C8       | C7       | -101.8(2)      |
| O1       | C9       | C10      | O2       | 170.78(15)     |
| O1       | C9       | C10      | O3       | -67.1(2)       |
| O1       | C9       | C10      | C5       | 52.7(2)        |
| C6       | C5       | C10      | O2       | -105.0(2)      |

|     |     |     |     |             |
|-----|-----|-----|-----|-------------|
| C6  | C5  | C10 | O3  | 135.90(19)  |
| C6  | C5  | C10 | C9  | 15.9(3)     |
| C6  | C7  | C8  | O1  | -51.7(2)    |
| C6  | C7  | C8  | C9  | 16.1(3)     |
| C2  | C3  | C4  | C5  | -1.3(3)     |
| C20 | C19 | C18 | C17 | 0.0(3)      |
| C4  | C3  | C2  | C11 | -179.04(16) |
| C4  | C3  | C2  | C1  | 1.3(3)      |
| C4  | C5  | C10 | O2  | 70.7(2)     |
| C4  | C5  | C10 | O3  | -48.4(2)    |
| C4  | C5  | C10 | C9  | -168.33(18) |
| C9  | O1  | C8  | C7  | 113.3(2)    |
| C1  | C6  | C5  | C4  | 0.3(3)      |
| C1  | C6  | C5  | C10 | 175.92(18)  |
| C1  | C6  | C7  | O4  | 46.9(2)     |
| C1  | C6  | C7  | C8  | 167.90(19)  |
| C19 | C20 | C15 | C16 | 1.6(3)      |
| C19 | C20 | C15 | C14 | -178.7(2)   |
| C19 | C18 | C17 | O2  | -178.54(18) |
| C19 | C18 | C17 | C16 | -0.2(3)     |
| C5  | C6  | C1  | O5  | -178.81(19) |
| C5  | C6  | C1  | C2  | -0.3(3)     |
| C5  | C6  | C7  | O4  | -137.33(19) |
| C5  | C6  | C7  | C8  | -16.3(3)    |
| C11 | O3  | C10 | O2  | 54.4(2)     |
| C11 | O3  | C10 | C9  | -66.8(2)    |
| C11 | O3  | C10 | C5  | 169.21(16)  |
| C11 | C16 | C15 | C14 | -1.9(3)     |
| C11 | C16 | C15 | C20 | 177.76(19)  |
| C11 | C16 | C17 | O2  | -0.1(3)     |
| C11 | C16 | C17 | C18 | -178.4(2)   |
| C11 | C12 | C13 | C14 | 0.6(3)      |
| C7  | C6  | C1  | O5  | -2.9(3)     |
| C7  | C6  | C1  | C2  | 175.67(18)  |
| C7  | C6  | C5  | C4  | -175.46(19) |
| C7  | C6  | C5  | C10 | 0.1(3)      |
| C15 | C16 | C11 | O3  | -173.91(18) |
| C15 | C16 | C11 | C12 | 3.6(3)      |
| C15 | C16 | C17 | O2  | 179.48(18)  |
| C15 | C16 | C17 | C18 | 1.2(3)      |

|     |     |     |     |             |
|-----|-----|-----|-----|-------------|
| C15 | C14 | C13 | C12 | 1.0(3)      |
| C15 | C20 | C19 | C18 | -0.7(3)     |
| C8  | O1  | C9  | C10 | -113.5(2)   |
| C8  | C9  | C10 | O2  | 102.3(2)    |
| C8  | C9  | C10 | O3  | -135.62(19) |
| C8  | C9  | C10 | C5  | -15.8(3)    |
| C10 | O2  | C17 | C16 | 22.4(3)     |
| C10 | O2  | C17 | C18 | -159.22(18) |
| C10 | O3  | C11 | C16 | -32.9(2)    |
| C10 | O3  | C11 | C12 | 149.65(18)  |
| C10 | C9  | C8  | O1  | 101.6(2)    |
| C10 | C9  | C8  | C7  | -0.2(3)     |
| C17 | O2  | C10 | O3  | -49.3(2)    |
| C17 | O2  | C10 | C9  | 70.6(2)     |
| C17 | O2  | C10 | C5  | -165.67(17) |
| C17 | C16 | C11 | O3  | 5.7(3)      |
| C17 | C16 | C11 | C12 | -176.85(19) |
| C17 | C16 | C15 | C14 | 178.52(19)  |
| C17 | C16 | C15 | C20 | -1.8(3)     |
| C13 | C14 | C15 | C16 | -0.3(3)     |
| C13 | C14 | C15 | C20 | -180.0(2)   |
| C13 | C12 | C11 | O3  | 174.53(18)  |
| C13 | C12 | C11 | C16 | -2.9(3)     |

Table 7 Hydrogen Atom Coordinates ( $\text{\AA} \times 10^4$ ) and Isotropic Displacement Parameters ( $\text{\AA}^2 \times 10^3$ ) for exp\_8018.

| Atom | x     | y    | z     | U(eq) |
|------|-------|------|-------|-------|
| H5   | 13240 | 4190 | 529   | 30    |
| H3   | 7002  | 6886 | -324  | 19    |
| H4   | 15482 | 2647 | 81    | 23    |
| H14  | 11451 | 4034 | -3588 | 19    |
| H20  | 15087 | 5532 | -3496 | 18    |
| H4A  | 8321  | 6127 | -1111 | 17    |
| H9   | 14666 | 3459 | -1670 | 17    |
| H12  | 7552  | 3053 | -2313 | 17    |
| H19  | 17559 | 6670 | -2969 | 19    |
| H18  | 16827 | 6737 | -2079 | 18    |
| H7   | 16131 | 4287 | -293  | 16    |
| H8   | 16611 | 2823 | -916  | 18    |
| H13  | 8319  | 2946 | -3204 | 19    |
